# Supplementary material for: Isolation and Identification of Benzochroman and Acylglycerols from Massa Medicata Fermentata and Their Inhibitory Effects on LPS-Stimulated Cytokine Production in Bone Marrow-Derived Dendritic Cells
Source: MDPI journal article supplement (doi:10.3390/molecules23092400), 2018-09-19
Supplement: s1 [file s1]

## Supplementary Data

### **Isolation and Identification of Benzochroman and Acylglycerols from *Massa Medicata Fermentata* and Their Inhibitory Effects on LPS-stimulated Cytokine Production in Bone Marrow-derived Dendritic Cells**

Ya Nan Sun<sup>1,†</sup>, Seo Young Yang<sup>1,†</sup>, Young-Sang Koh<sup>2</sup>, Young Ho Kim<sup>1,\*</sup>, and Wei Li<sup>3,\*</sup>

1 College of Pharmacy, Chungnam National University, Daejeon 34134, Republic of Korea; yanansun@163.com (Y.N.S.); syyang@cnu.ac.kr (S.Y.Y.); yhk@cnu.ac.kr (Y.H.K.)

2 School of Medicine and Brain Korea 21 Program, and Institute of Medical Science, Jeju National University, Jeju 690-756, Republic of Korea; yskoh7@jejunu.ac.kr (Y.S.K.)

3 Korean Medicine (KM) Application Center, Korea Institute of Oriental Medicine, Daegu 41062, Republic of Korea; liwei1986@kiom.re.kr (W.L.)

\*Correspondence: liwei1986@kiom.re.kr; Tel.: +82-53-940-3874 (W.L.); yhk@cnu.ac.kr, Tel.: +82-42-821-5933 (Y.H.K.)

† Ya Nan Sun and Seo Young Yang have contributed equally to this work.

## Contents

**Figure S1.**  $^1\text{H}$  NMR spectrum of compound **1** in  $\text{CD}_3\text{OD}$  (600 MHz)

**Figure S2.**  $^{13}\text{C}$  NMR spectrum of compound **1** in  $\text{CD}_3\text{OD}$  (150 MHz)

**Figure S3.** HMQC spectrum of compound **1** in  $\text{CD}_3\text{OD}$

**Figure S4.** HMBC spectrum of compound **1** in  $\text{CD}_3\text{OD}$

**Figure S5.** COSY spectrum of compound **1** in  $\text{CD}_3\text{OD}$

**Figure S6.** HR-ESI-MS data of compound **1**

**Figure S7.** HPLC data of compound **1**

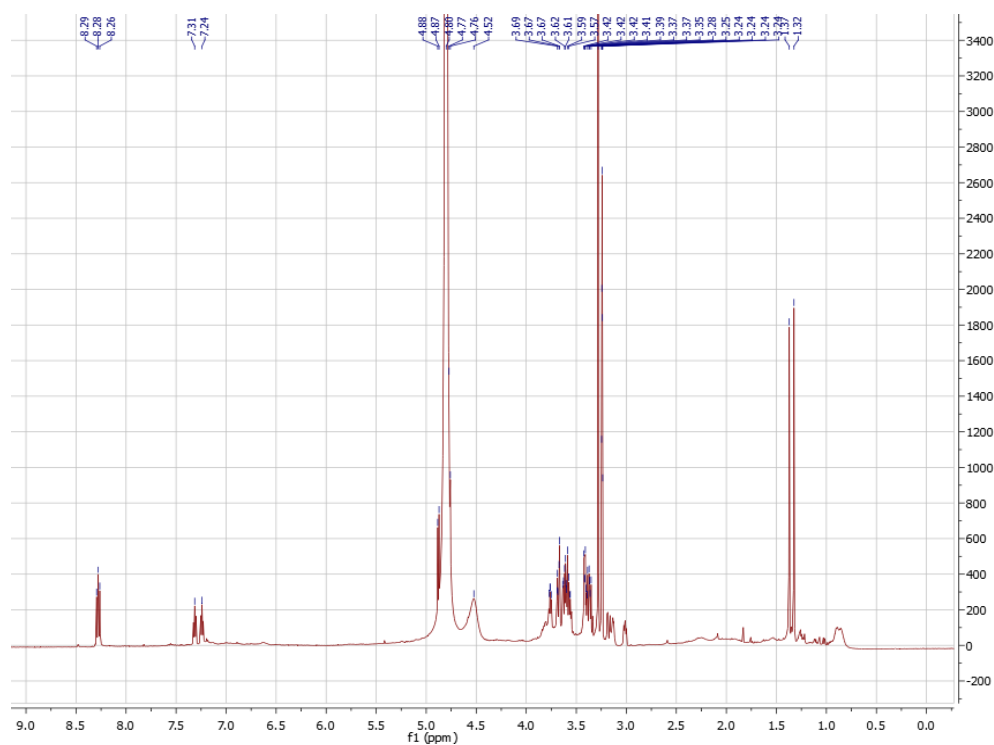

**Figure S1.**  $^1\text{H}$  NMR spectrum of compound **1** in  $\text{CD}_3\text{OD}$  (600 MHz)

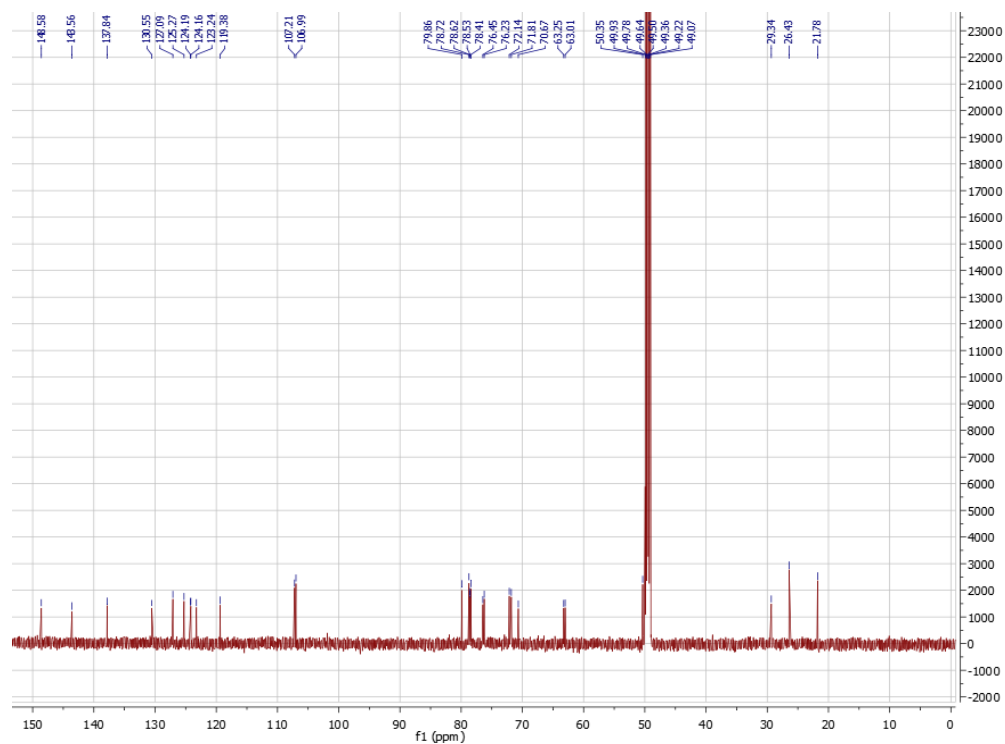

**Figure S2.**  $^{13}\text{C}$  NMR spectrum of compound **1** in  $\text{CD}_3\text{OD}$  (150MHz)

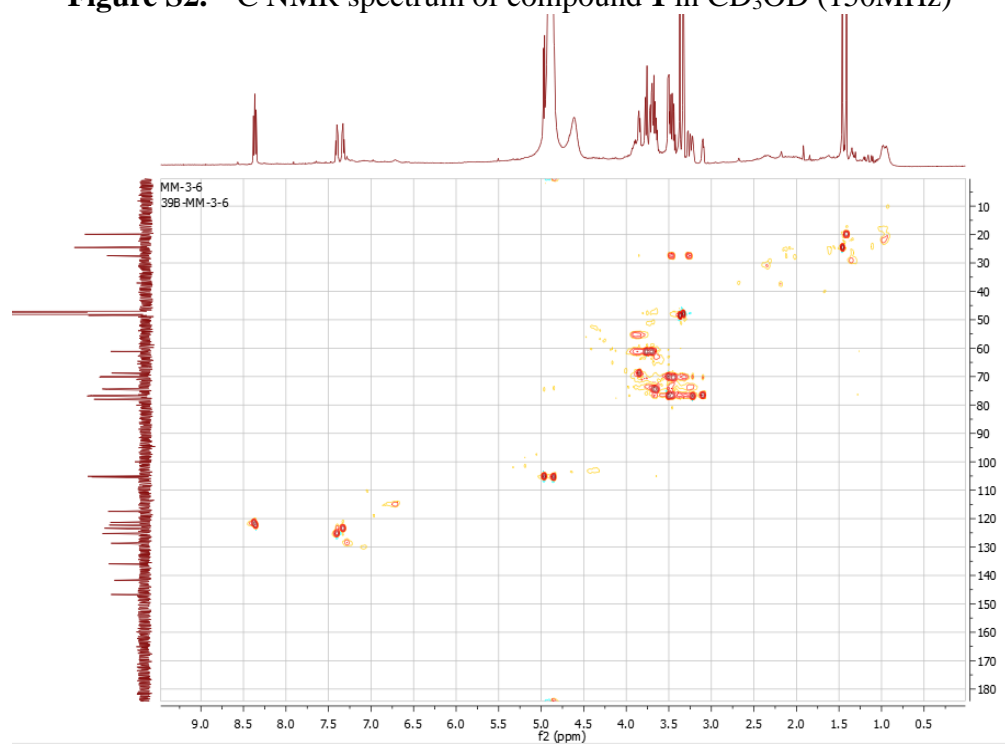

**Figure S3.** HMQC spectrum of compound **1** in  $\text{CD}_3\text{OD}$

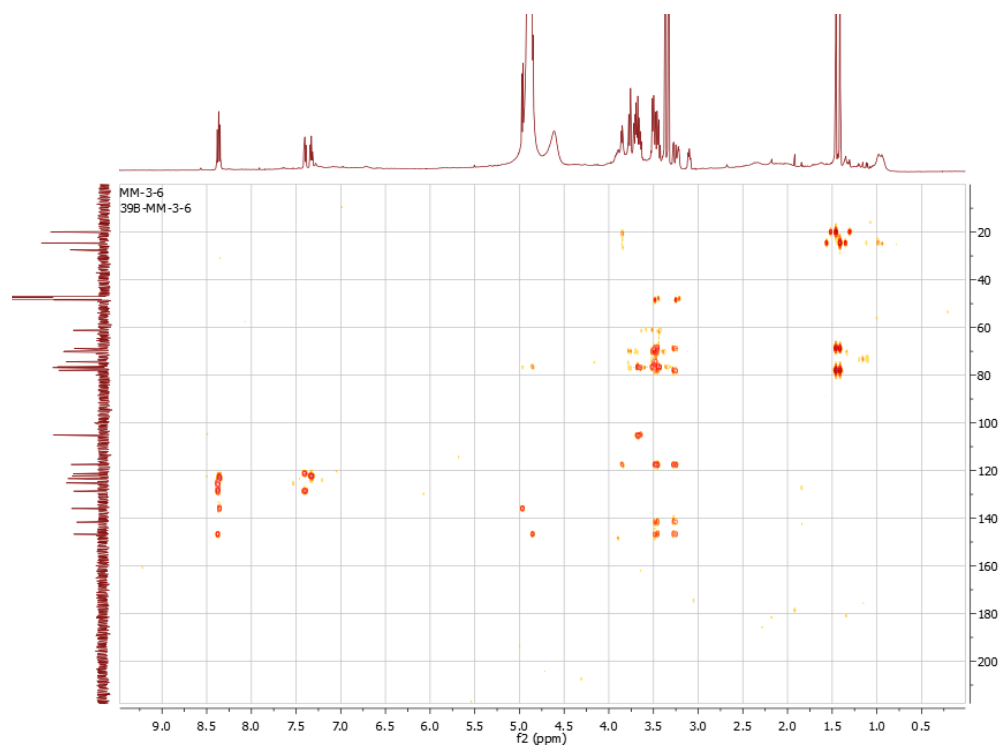

**Figure S4.** HMBC spectrum of compound **1** in CD<sub>3</sub>OD

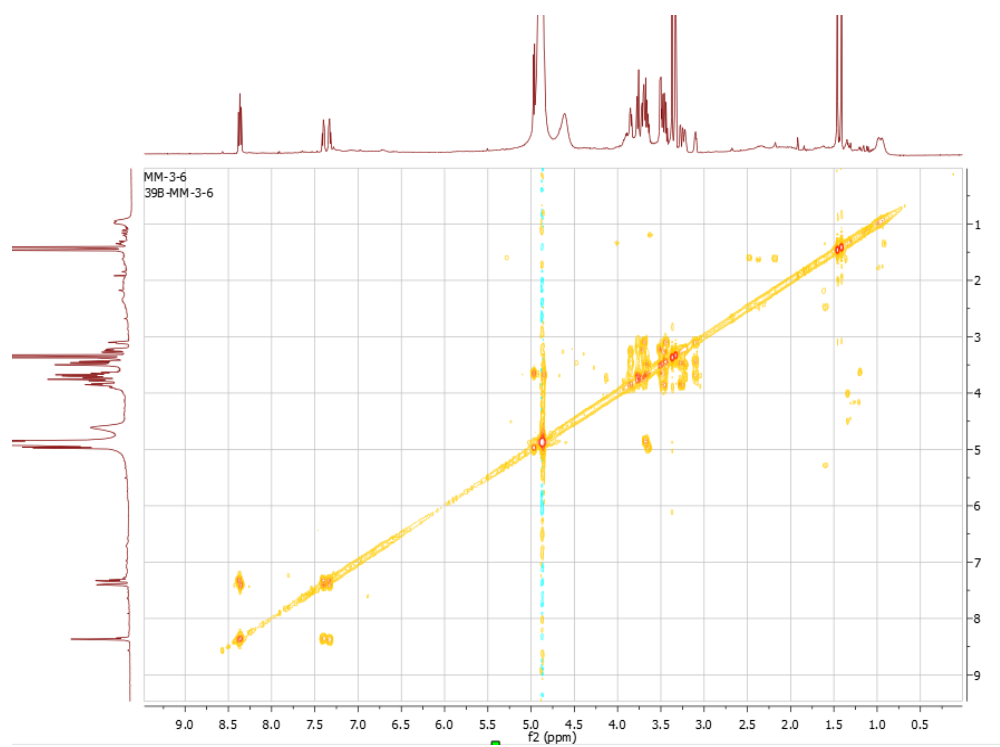

**Figure S5.** COSY spectrum of compound **1** in CD<sub>3</sub>OD

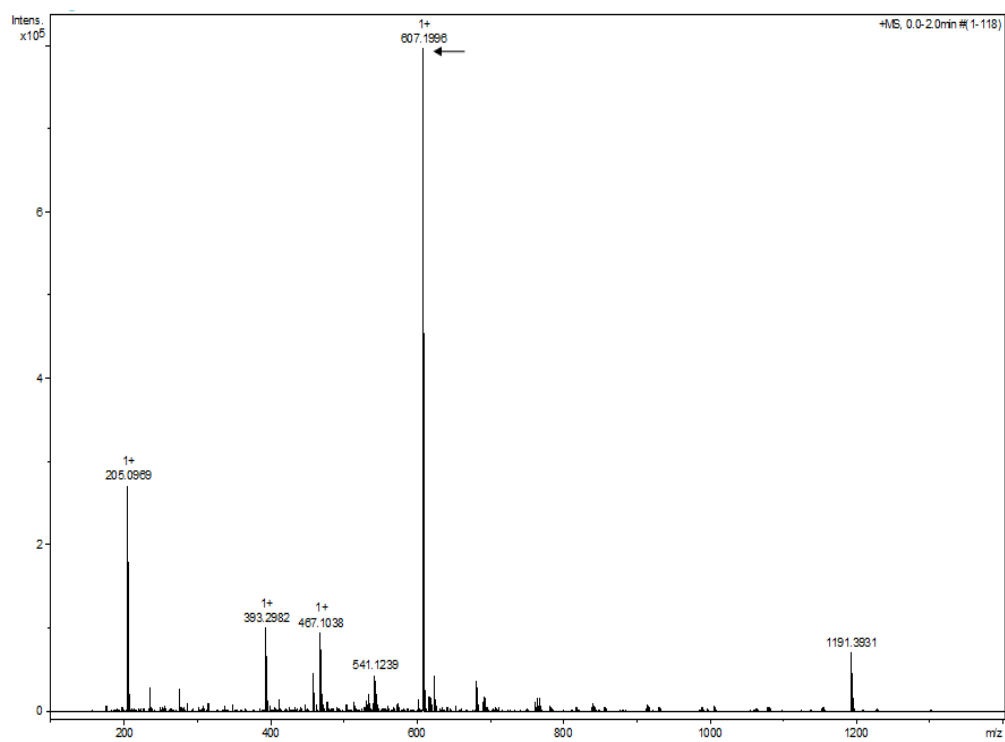

**Figure S6.** HR-ESI-MS data of compound **1**

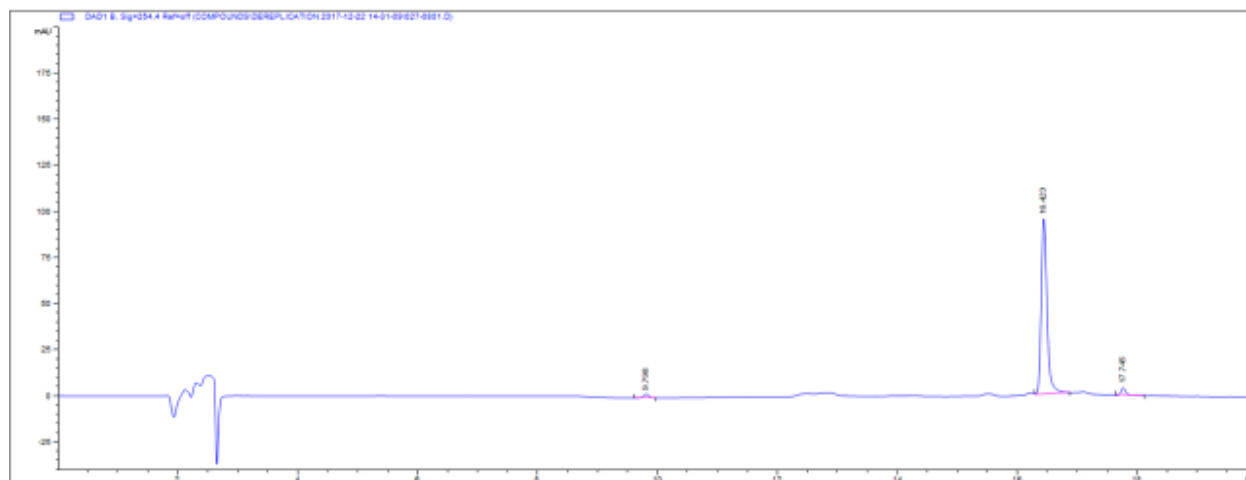

**Figure S7.** HPLC data of compound **1**

Instrument : Agilent 1260 infinity HPLC system (Agilent Technologies, Santa Clara, CA, USA)

Column : Phenomenex, Luna C18 (2), 5 mm, 100 Å, 150 x 4.6 mm, room temperature

Flow rate: 0.8 mL/min

Detection : UV 254 nm

| Time (min) | Water (%) | ACN (%) |
|------------|-----------|---------|
| 0          | 90        | 10      |
| 5          | 90        | 10      |
| 15         | 0         | 100     |
| 20         | 0         | 100     |
